# Supplementary material
Source: PubMed Central journal article supplement (PMC7025809)

**Supplementary Table 1.  
Radiotherapy characteristics.**

Descriptors of the radiotherapy treatment courses are listed for the patient cohort. Dose-volume histogram characteristics, such as mean dose, D<sub>2</sub>, D<sub>98</sub> were calculated after regions of interest (brain, temporal lobe, hippocampus) were censored to exclude the gross tumor volume.

| Radiotherapy Characteristic   | Patient Cohort, n = 37 |
|-------------------------------|------------------------|
| Treatment type: n[%]          |                        |
| Photons                       | 27 [73%]               |
| Protons                       | 10 [27%]               |
| Prescription dose: Gy         |                        |
| Median                        | 59.4                   |
| Interquartile range           | 54-59.4                |
| Dose schedule: n [%]          |                        |
| 54 Gy / 30 Fx                 | 11 [29.7%]             |
| 59.4 Gy / 33 Fx               | 10 [27.0%]             |
| 60 Gy / 30 Fx                 | 8 [21.6%]              |
| 50.4 Gy / 28 Fx               | 7 [18.9%]              |
| 70 Gy / 35 Fx <sup>#</sup>    | 1 [2.7%]               |
| Mean dose Gy [95% CI]:        |                        |
| Brain                         | 16.0 [12.2 – 19.8]     |
| Temporal Lobe                 |                        |
| Left                          | 19.7 [12.8 – 26.6]     |
| Right                         | 16.6 [11.0 – 22.2]     |
| Hippocampus                   |                        |
| Left                          | 23.5 [16.5 – 30.3]     |
| Right                         | 21.4 [15.1 – 27.7]     |
| D <sub>2</sub> : Gy [95% CI]  |                        |
| Brain                         | 1.1 [0.6 – 1.7]        |
| Temporal Lobe                 |                        |
| Left                          | 10.5 [4.3 – 16.7]      |
| Right                         | 6.5 [3.5 – 9.5]        |
| Hippocampus                   |                        |
| Left                          | 15.3 [8.3 – 22.2]      |
| Right                         | 14.5 [8.0 – 21.0]      |
| D <sub>98</sub> : Gy [95% CI] |                        |
| Brain                         | 52.8 [48.7 – 56.9]     |
| Temporal Lobe                 |                        |
| Left                          | 33.7 [26.1 – 41.3]     |
| Right                         | 30.3 [23.6 – 36.9]     |
| Hippocampus                   |                        |
| Left                          | 34.6 [27.2 – 41.9]     |
| Right                         | 31.6 [24.9 – 38.3]     |

<sup>#</sup> Prescription dose to low grade chondrosarcoma.

| Neurocognitive Test                       | Brief Description                                                                                                                                               | References                                                                                                                                                                                                                                                                                                                                                                                                                                                                   |
|-------------------------------------------|-----------------------------------------------------------------------------------------------------------------------------------------------------------------|------------------------------------------------------------------------------------------------------------------------------------------------------------------------------------------------------------------------------------------------------------------------------------------------------------------------------------------------------------------------------------------------------------------------------------------------------------------------------|
| Hopkins Verbal Learning Test-Revised      | <ul style="list-style-type: none"> <li>Validated within Alzheimer's disease and amnesic disorder patients as a measure of verbal learning and memory</li> </ul> | <ul style="list-style-type: none"> <li>Benedict RHB, Schretlen D, Groninger L et al. Hopkins Verbal Learning Test – Revised: Normative Data and Analysis of Inter-Form and Test-Retest Reliability. <i>The Clinical Neuropsychologist</i> 1998; 12(1).</li> <li>Hopkins Verbal Learning Test-Revised   HVLTR. Retrieved from <a href="https://www.parinc.com/Products/Pkey/130">https://www.parinc.com/Products/Pkey/130</a></li> </ul>                                      |
| Delis-Kaplan Executive Functioning System | <ul style="list-style-type: none"> <li>Assess key components of executive functions mediated by frontal lobe.</li> </ul>                                        | <ul style="list-style-type: none"> <li>Delis DC, Kramer JH, Kaplan E et al. Reliability and validity of the Delis-Kaplan Executive Function System: An update. <i>Journal of the International Neuropsychological Society</i> 2004; 10(2).</li> <li>Homack S, Lee D, Riccio CA. Test review: Delis Kaplan executive function system. <i>J Clin Exp Neuropsychol</i> 2005; 27(5)</li> </ul>                                                                                   |
| Brief Visuospatial Memory Test            | <ul style="list-style-type: none"> <li>Measure of visuospatial memory</li> </ul>                                                                                | <ul style="list-style-type: none"> <li>Benedict, R. H. B., Schretlen, D., Groninger, L., Dobraski, M., &amp; Shpritz, B. (1996). Revision of the Brief Visuospatial Memory Test: Studies of normal performance, reliability, and validity. <i>Psychological Assessment</i>, 8(2), 145-153.</li> <li>Brief Visuospatial Memory Test–Revised   BVMT-R. Retrieved from <a href="https://www.parinc.com/Products/Pkey/30">https://www.parinc.com/Products/Pkey/30</a></li> </ul> |

| Neurocognitive Test         | Brief Description                                                                                                                        | References                                                                                                                                                                                                                                                                                                                                |
|-----------------------------|------------------------------------------------------------------------------------------------------------------------------------------|-------------------------------------------------------------------------------------------------------------------------------------------------------------------------------------------------------------------------------------------------------------------------------------------------------------------------------------------|
| Wisconsin Card Sorting Test | <ul style="list-style-type: none"> <li>Test of cognitive reasoning</li> <li>Can be used to assess damage to prefrontal cortex</li> </ul> | <ul style="list-style-type: none"> <li>Anderson S, Damasia H, Jones RD et al. Wisconsin card test performance as a measure of frontal lobe damage. <i>J Clin Exp Neuropsychol</i> 1991; 13(6)</li> <li>Chelune GJ, Baer RA. Developmental norms for the Wisconsin card sorting test. <i>J Clin Exp Neuropsychol</i> 1986; 8(3)</li> </ul> |
| Boston Naming Test          | <ul style="list-style-type: none"> <li>Test of visual confrontation naming for aphasia and dementia</li> </ul>                           | <ul style="list-style-type: none"> <li>Borod JC, Goodglass H, Kaplan E et al. Normative data on the boston diagnostic aphasia examination, parietal lobe batter, and the boston naming test</li> </ul>                                                                                                                                    |
| Wechsler Memory Scale       | <ul style="list-style-type: none"> <li>Assess memory functioning</li> </ul>                                                              | <ul style="list-style-type: none"> <li>Prigatano DP. Wechsler memory scale: A selective review of the literature. <i>Journal of Clinical Psychology</i> 1978.</li> </ul>                                                                                                                                                                  |

**Supplementary Table 2. Neurocognitive Tests.** Brief descriptions and additional references for each of the neurocognitive tests used in this study.

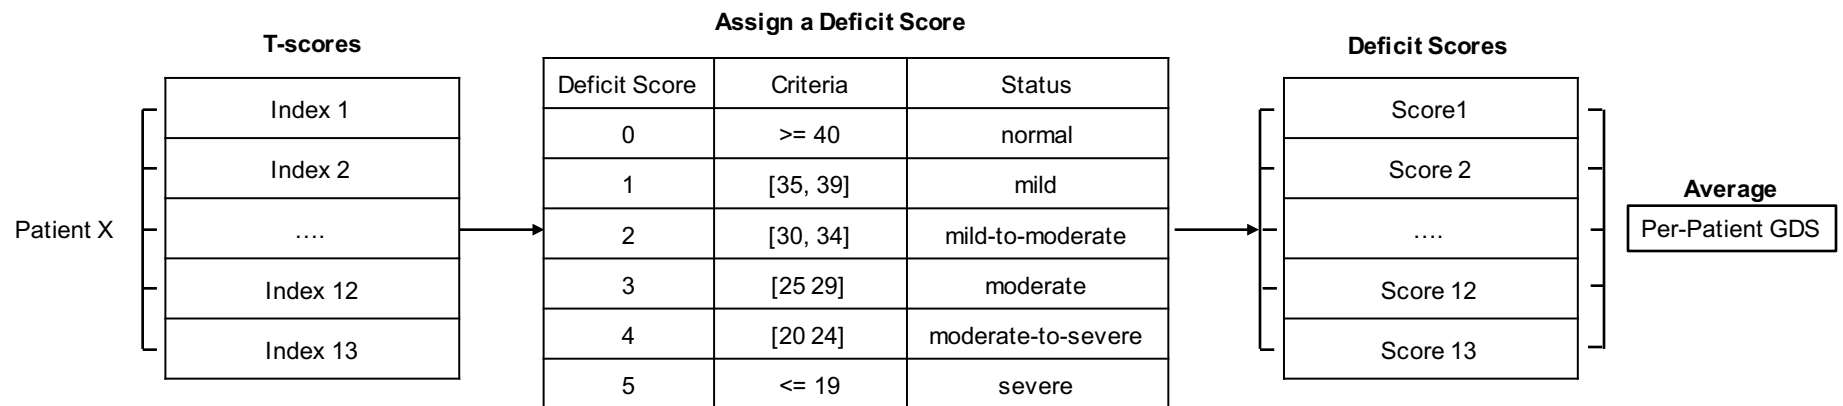

**Supplemental Figure 1. Calculation of global deficit score (GDS).** First, individual T-scores were assigned a deficit score: 0 if greater than or equal to 40 (normal), 1 if between 35 and 39 (mild), 2 if between 30 and 34 (mild-to-moderate), 3 if between 25 and 29 (moderate), 4 if between 20 and 24 (moderate-to-severe), and 5 if less than or equal to 19 (severe). Per-patient GDS was then calculated as the mean of the deficit scores for that patient.

**Supplemental Figure 2. Statistically significant associations.** Per-patient GDS values are plotted against size of PTV ( $p = 0.048$ ), tumor type ( $p = 0.043$ ), use of antiepileptic drugs ( $p = 0.0088$ ), and seizures ( $p = 0.0069$ ).

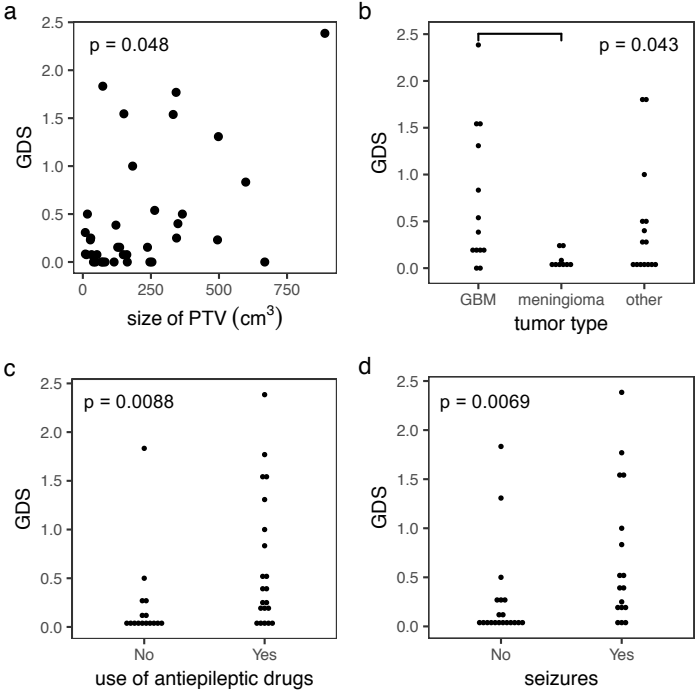

Supplement: NIHMS1544365-supplement-11060_2019_3353_MOESM1_ESM.pdf [file NIHMS1544365-supplement-11060_2019_3353_MOESM1_ESM.pdf]
